# Supplementary material
Source: HighWire-hosted journal article supplement (https://cmajopen.ca/highwire/filestream/81056/field_highwire_adjunct_files/1/original-submission.pdf)
Supplement: original-submission.pdf [file original-submission.pdf]

## Development of a provisional essential medicines list for children in Canada

|                               |                                                                                                                                                                                                                                                                                                                                                                                                                                                                                                                                                                                                                                                                                                                                                                                                                                         |
|-------------------------------|-----------------------------------------------------------------------------------------------------------------------------------------------------------------------------------------------------------------------------------------------------------------------------------------------------------------------------------------------------------------------------------------------------------------------------------------------------------------------------------------------------------------------------------------------------------------------------------------------------------------------------------------------------------------------------------------------------------------------------------------------------------------------------------------------------------------------------------------|
| Journal:                      | <i>CMAJ Open</i>                                                                                                                                                                                                                                                                                                                                                                                                                                                                                                                                                                                                                                                                                                                                                                                                                        |
| Manuscript ID                 | CMAJOpen-2017-0129                                                                                                                                                                                                                                                                                                                                                                                                                                                                                                                                                                                                                                                                                                                                                                                                                      |
| Manuscript Type:              | Descriptive                                                                                                                                                                                                                                                                                                                                                                                                                                                                                                                                                                                                                                                                                                                                                                                                                             |
| Date Submitted by the Author: | 05-Oct-2017                                                                                                                                                                                                                                                                                                                                                                                                                                                                                                                                                                                                                                                                                                                                                                                                                             |
| Complete List of Authors:     | Persaud, Navindra; St Michael's Hospital, Family Medicine Woods, Hannah ; St. Michael's Hospital, Centre for Urban Health Solutions, Li Ka Shing Knowledge Institute<br>Oronsaye, Efosa; St. Michael's Hospital, Centre for Urban Health Solutions, Li Ka Shing Knowledge Institute<br>Bali, Anjli; St. Michael's Hospital, Centre for Urban Health Solutions, Li Ka Shing Knowledge Institute<br>Rajakulasingam, Yathavan; St. Michael's Hospital, Centre for Urban Health Solutions, Li Ka Shing Knowledge Institute<br>Lee, Taehoon; Li Ka Shing Knowledge Institute, St. Michael's Hospital<br>Umali, Norman; St. Michael's Hospital, Centre for Urban Health Solutions, Li Ka Shing Knowledge Institute<br>Cohen, Eyal<br>Finkelstein, Yaron<br>Offringa, Martin; The Hospital for Sick Children, Child Health Evaluative Sciences |
| Keywords:                     | Family medicine, general practice, primary care, Pediatrics, Pharmacoepidemiology                                                                                                                                                                                                                                                                                                                                                                                                                                                                                                                                                                                                                                                                                                                                                       |
| More Detailed Keywords:       |                                                                                                                                                                                                                                                                                                                                                                                                                                                                                                                                                                                                                                                                                                                                                                                                                                         |
| Abstract:                     | Background: Worldwide, many countries have developed a list of essential medicines for children to improve prescribing. We aimed to create an essential medicines list for children in Canada.<br>Methods: We adapted the previously created list of essential medicines for adults in Canada and the WHO Model List of Essential Medicines for Children to create a provisional list of essential medicines for children in Canada. Canadian clinicians made suggestions for changes. Literature relevant to each suggestion was presented to clinician-scientists who used a modified nominal group technique to make recommendations on the                                                                                                                                                                                          |

1  
2  
3  
4  
5  
6  
7  
8  
9  
10  
11  
12  
13  
14  
15  
16  
17  
18  
19  
20  
21  
22  
23  
24  
25  
26  
27  
28  
29  
30  
31  
32  
33  
34  
35  
36  
37  
38  
39  
40  
41  
42  
43  
44  
45  
46  
47  
48  
49  
50  
51  
52  
53  
54  
55  
56  
57  
58  
59  
60

|  |                                                                                                                                                                                                                                                                                                                                                                                                                                                                                                                                                                                                                                                                                                                                                                                                                                                                                                                                                                                                                                                                                                                                            |
|--|--------------------------------------------------------------------------------------------------------------------------------------------------------------------------------------------------------------------------------------------------------------------------------------------------------------------------------------------------------------------------------------------------------------------------------------------------------------------------------------------------------------------------------------------------------------------------------------------------------------------------------------------------------------------------------------------------------------------------------------------------------------------------------------------------------------------------------------------------------------------------------------------------------------------------------------------------------------------------------------------------------------------------------------------------------------------------------------------------------------------------------------------|
|  | <p>suggestions. The Ontario Public Drug Programs prescription data was reviewed to identify commonly prescribed medications missing from the list. Literature relevant to these medications was shared with a clinician-scientist review panel to determine which should be added, and a revised list was developed.</p> <p>Results: 76 removals from the list of essential medicines for adults in Canada were made because they were not indicated for use in children; 7 medications were added to the child list based on Ontario Public Drugs Programs prescribing data and clinician-scientist review. Suggestions to add, remove, or substitute medications were made by peer-reviewers and resulted in one medication removal and one medication replacement. The process produced a provisional list of 64 medications for children.</p> <p>Interpretation: A provisional list of 64 essential medicines for children was developed. The list should be further developed based on wider input and continuously revised based on emerging evidence of safety and effectiveness of these medicines in all pediatric age groups</p> |
|--|--------------------------------------------------------------------------------------------------------------------------------------------------------------------------------------------------------------------------------------------------------------------------------------------------------------------------------------------------------------------------------------------------------------------------------------------------------------------------------------------------------------------------------------------------------------------------------------------------------------------------------------------------------------------------------------------------------------------------------------------------------------------------------------------------------------------------------------------------------------------------------------------------------------------------------------------------------------------------------------------------------------------------------------------------------------------------------------------------------------------------------------------|

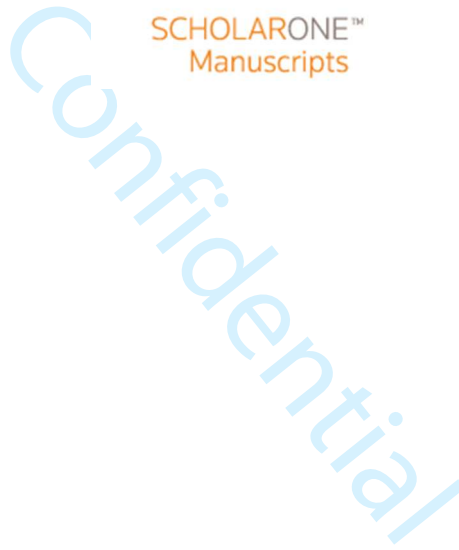

## STROBE Statement—checklist of items that should be included in reports of observational studies

|                              | <b>Item No</b> | <b>Recommendation</b>                                                                                                                                                                                                                                                                                                                                                                                                                                                                                                                                                                                                                                                                                          |
|------------------------------|----------------|----------------------------------------------------------------------------------------------------------------------------------------------------------------------------------------------------------------------------------------------------------------------------------------------------------------------------------------------------------------------------------------------------------------------------------------------------------------------------------------------------------------------------------------------------------------------------------------------------------------------------------------------------------------------------------------------------------------|
| <b>Title and abstract</b>    | 1              | (a) Indicate the study's design with a commonly used term in the title or the abstract<br>N/A<br>(b) Provide in the abstract an informative and balanced summary of what was done and what was found<br><b>Page 2</b>                                                                                                                                                                                                                                                                                                                                                                                                                                                                                          |
| <b>Introduction</b>          |                |                                                                                                                                                                                                                                                                                                                                                                                                                                                                                                                                                                                                                                                                                                                |
| Background/rationale         | 2              | Explain the scientific background and rationale for the investigation being reported<br><b>Page 3</b>                                                                                                                                                                                                                                                                                                                                                                                                                                                                                                                                                                                                          |
| Objectives                   | 3              | State specific objectives, including any prespecified hypotheses<br><b>Page 4</b>                                                                                                                                                                                                                                                                                                                                                                                                                                                                                                                                                                                                                              |
| <b>Methods</b>               |                |                                                                                                                                                                                                                                                                                                                                                                                                                                                                                                                                                                                                                                                                                                                |
| Study design                 | 4              | Present key elements of study design early in the paper<br><b>Pages 4-9</b>                                                                                                                                                                                                                                                                                                                                                                                                                                                                                                                                                                                                                                    |
| Setting                      | 5              | Describe the setting, locations, and relevant dates, including periods of recruitment, exposure, follow-up, and data collection<br><b>Pages 4-9 (some of the above is not applicable)</b>                                                                                                                                                                                                                                                                                                                                                                                                                                                                                                                      |
| Participants                 | 6              | (a) <i>Cohort study</i> —Give the eligibility criteria, and the sources and methods of selection of participants. Describe methods of follow-up<br><i>Case-control study</i> —Give the eligibility criteria, and the sources and methods of case ascertainment and control selection. Give the rationale for the choice of cases and controls<br><i>Cross-sectional study</i> —Give the eligibility criteria, and the sources and methods of selection of participants<br>N/A<br>(b) <i>Cohort study</i> —For matched studies, give matching criteria and number of exposed and unexposed<br><i>Case-control study</i> —For matched studies, give matching criteria and the number of controls per case<br>N/A |
| Variables                    | 7              | Clearly define all outcomes, exposures, predictors, potential confounders, and effect modifiers. Give diagnostic criteria, if applicable<br>N/A                                                                                                                                                                                                                                                                                                                                                                                                                                                                                                                                                                |
| Data sources/<br>measurement | 8*             | For each variable of interest, give sources of data and details of methods of assessment (measurement). Describe comparability of assessment methods if there is more than one group<br>N/A                                                                                                                                                                                                                                                                                                                                                                                                                                                                                                                    |
| Bias                         | 9              | Describe any efforts to address potential sources of bias<br>N/A                                                                                                                                                                                                                                                                                                                                                                                                                                                                                                                                                                                                                                               |
| Study size                   | 10             | Explain how the study size was arrived at<br>N/A                                                                                                                                                                                                                                                                                                                                                                                                                                                                                                                                                                                                                                                               |
| Quantitative variables       | 11             | Explain how quantitative variables were handled in the analyses. If applicable, describe which groupings were chosen and why                                                                                                                                                                                                                                                                                                                                                                                                                                                                                                                                                                                   |

|                     |     |                                                                                                                                                                                                                                                                                                                                                                                                                                                                                                                                                                                               |
|---------------------|-----|-----------------------------------------------------------------------------------------------------------------------------------------------------------------------------------------------------------------------------------------------------------------------------------------------------------------------------------------------------------------------------------------------------------------------------------------------------------------------------------------------------------------------------------------------------------------------------------------------|
|                     |     | N/A                                                                                                                                                                                                                                                                                                                                                                                                                                                                                                                                                                                           |
| Statistical methods | 12  | (a) Describe all statistical methods, including those used to control for confounding<br>(b) Describe any methods used to examine subgroups and interactions<br>N/A<br>(c) Explain how missing data were addressed<br>N/A<br>(d) <i>Cohort study</i> —If applicable, explain how loss to follow-up was addressed<br><i>Case-control study</i> —If applicable, explain how matching of cases and controls was addressed<br><i>Cross-sectional study</i> —If applicable, describe analytical methods taking account of sampling strategy<br>N/A<br>(e) Describe any sensitivity analyses<br>N/A |
| <b>Results</b>      |     |                                                                                                                                                                                                                                                                                                                                                                                                                                                                                                                                                                                               |
| Participants        | 13* | (a) Report numbers of individuals at each stage of study—eg numbers potentially eligible, examined for eligibility, confirmed eligible, included in the study, completing follow-up, and analysed<br>N/A<br>(b) Give reasons for non-participation at each stage<br>N/A<br>(c) Consider use of a flow diagram<br>N/A                                                                                                                                                                                                                                                                          |
| Descriptive data    | 14* | (a) Give characteristics of study participants (eg demographic, clinical, social) and information on exposures and potential confounders<br>N/A<br>(b) Indicate number of participants with missing data for each variable of interest<br>N/A<br>(c) <i>Cohort study</i> —Summarise follow-up time (eg, average and total amount)<br>N/A                                                                                                                                                                                                                                                      |
| Outcome data        | 15* | <i>Cohort study</i> —Report numbers of outcome events or summary measures over time<br>N/A<br><i>Case-control study</i> —Report numbers in each exposure category, or summary measures of exposure<br>N/A<br><i>Cross-sectional study</i> —Report numbers of outcome events or summary measures<br>N/A                                                                                                                                                                                                                                                                                        |
| Main results        | 16  | (a) Give unadjusted estimates and, if applicable, confounder-adjusted estimates and their precision (eg, 95% confidence interval). Make clear which confounders were adjusted for and why they were included<br>N/A<br>(b) Report category boundaries when continuous variables were categorized<br>N/A<br>(c) If relevant, consider translating estimates of relative risk into absolute risk for a meaningful time period<br>N/A                                                                                                                                                            |
| Other analyses      | 17  | Report other analyses done—eg analyses of subgroups and interactions, and sensitivity                                                                                                                                                                                                                                                                                                                                                                                                                                                                                                         |

1 analyses

2 N/A

3

---

4 **Discussion**

5 Key results 18 Summarise key results with reference to study objectives

6 **Pages 9-12**

7

8 Limitations 19 Discuss limitations of the study, taking into account sources of potential bias or imprecision.

9 Discuss both direction and magnitude of any potential bias

10 **Page 14-15**

11 Interpretation 20 Give a cautious overall interpretation of results considering objectives, limitations,  
12 multiplicity of analyses, results from similar studies, and other relevant evidence

13 **Pages 12-14**

14

15 Generalisability 21 Discuss the generalisability (external validity) of the study results

16 N/A

17

---

18 **Other information**

19 Funding 22 Give the source of funding and the role of the funders for the present study and, if applicable,  
20 for the original study on which the present article is based

21 N/A

22

23 \*Give information separately for cases and controls in case-control studies and, if applicable, for exposed and  
24 unexposed groups in cohort and cross-sectional studies.

25

26

27 **Note:** An Explanation and Elaboration article discusses each checklist item and gives methodological background and  
28 published examples of transparent reporting. The STROBE checklist is best used in conjunction with this article (freely  
29 available on the Web sites of PLoS Medicine at <http://www.plosmedicine.org/>, Annals of Internal Medicine at  
30 <http://www.annals.org/>, and Epidemiology at <http://www.epidem.com/>). Information on the STROBE Initiative is  
31 available at [www.strobe-statement.org](http://www.strobe-statement.org).

32

33

34

35

36

37

38

39

40

41

42

43

44

45

46

47

48

49

50

51

52

53

54

55

56

57

58

59

60

1  
2  
3 1 Hannah Woods, BHSc, MSc, Efosa Oronsaye, MBBS, MPH, Anjli Bali, MD, Yathavan  
4 2 Rajakulasingam, MD, Taehoon Lee, MD, MPH, Norman Umali, RPh, Eyal Cohen, MD,  
5 3 MSc, Yaron Finkelstein, BMedSc, MD, Martin Offringa, MD, PhD, Nav Persaud, BA,  
6 4 BSc, MD, MSc  
7 5

8 6  
9 6 **Affiliations:** Centre for Urban Health Solutions, Li Ka Shing Knowledge Institute, St  
10 7 Michael's Hospital (Woods, Oronsaye, Bali, Rajakulasingam, Lee, Umali, Persaud); St.  
11 8 Michael's Hospital; Department of Family and Community Medicine (Persaud); The  
12 9 Hospital for Sick Children (Cohen, Finkelstein, Offringa); University of Toronto  
13 10 (Persaud, Cohen, Finkelstein, Offringa); Institute of Health Policy, Management and  
14 11 Evaluation (Cohen).

15 12  
16 12 **Corresponding Author:** Dr. Nav Persaud. 30 Bond Street, Toronto, Ontario, Canada,  
17 13 M5B 1W8. nav.persaud@utoronto.ca, Phone: 416-360-4000 Ext. 77578  
18 14

19 14  
20 14 **Keywords:** family medicine, general practice, pediatrics, pharmacoepidemiology,  
21 15 primary care  
22 16

23 16 **Word count:** 2669  
24 17

25 17 **Competing Interests:** *The authors have no competing interests.* All authors have  
26 18 completed the ICMJE uniform disclosure form at [www.icmje.org/coi\\_disclosure.pdf](http://www.icmje.org/coi_disclosure.pdf)  
27 19 and declare: no support from any organization for the submitted work; no financial  
28 20 relationships with any organizations that might have an interest in the submitted work  
29 21 in the previous three years; no other relationships or activities that could appear to have  
30 22 influenced the submitted work.  
31 23

32 23  
33 23 **Funding Statement:** This research received no specific grant from any funding  
34 24 agency in the public, commercial or not-for-profit sectors.  
35 25

36 25 **Contributions:** NP conceived of the study; NP, HW, EO, AB, YR, TL, EC, YF and MO  
37 26 conducted the study; NP, HW, EO, AB, YR, TL, EC, YF, and MO interpreted the  
38 27 findings. HW and NP wrote the first manuscript draft; NP, HW, EO, AB, YR, TL, EC, YF,  
39 28 and MO were involved in revising it critically for important intellectual content and all  
40 29 approved of the final version. All authors will be accountable for all aspects of the work  
41 30 in ensuring that questions related to the accuracy or integrity of any part of the work are  
42 31 appropriately investigated and resolved.  
43 32  
44 32

45 33 **Acknowledgement:** The authors thank Lee Dupuis for helpful comments on the  
46 34 article.  
47 35  
48 35  
49 36  
50 36  
51 37  
52 37  
53 37  
54 37  
55 37  
56 37  
57 37  
58 37  
59 37  
60 37

# Development of a provisional essential medicines list for children in Canada

## ABSTRACT

**Background:** Worldwide, many countries have developed a list of essential medicines for children to improve prescribing. We aimed to create an essential medicines list for children in Canada.

**Methods:** We adapted the previously created list of essential medicines for adults in Canada and the WHO Model List of Essential Medicines for Children to create a provisional list of essential medicines for children in Canada. Canadian clinicians made suggestions for changes. Literature relevant to each suggestion was presented to clinician-scientists who used a modified nominal group technique to make recommendations on the suggestions. The Ontario Public Drug Programs prescription data was reviewed to identify commonly prescribed medications missing from the list. Literature relevant to these medications was shared with a clinician-scientist review panel to determine which should be added, and a revised list was developed.

**Results:** 76 removals from the list of essential medicines for adults in Canada were made because they were not indicated for use in children; 7 medications were added to the child list based on Ontario Public Drugs Programs prescribing data and clinician-scientist review. Suggestions to add, remove, or substitute medications were made by peer-reviewers and resulted in one medication removal and one medication replacement. The process produced a provisional list of 64 medications for children.

**Interpretation:** A provisional list of 64 essential medicines for children was developed. The list should be further developed based on wider input and continuously revised based on emerging evidence of safety and effectiveness of these medicines in all pediatric age groups.

## 69 INTRODUCTION

70  
71 In 1977, the World Health Organization (WHO) created a model list of essential  
72 medicines that is updated every 2 years based on up-to-date evidence for efficacy, safety  
73 and tolerability. (1-2) The WHO recommends that each country evaluate and adapt the  
74 list in order to create a list of essential medicines that is appropriate for its own  
75 environment. Previously, we adapted the WHO model list of essential medicines to  
76 create a list of essential medicines for adults in Canada. (3) This list may contribute to  
77 improved quality of care where a short list of essential medications may make it easier  
78 for clinicians to prescribe the most effective, safe and appropriate medication (4-6) and  
79 more appropriate use of drugs. (7-8)

80 The WHO developed its first model list of essential medicines for children in  
81 2007 in an effort to make safe and effective medicines as available for children as for  
82 adults. (9-10) The current 5th edition lists medications deemed to be the most  
83 efficacious, safe and cost-effective for priority conditions and diseases. The WHO  
84 recommends that the list of essential medicines for children be adapted by countries  
85 according to local context and policy.

86 In Canada, there is no list or central source of information related to safety,  
87 efficacy, and tolerability of medication forms and formulations for children. This, in  
88 combination with the large number of medications available for children with unknown  
89 safety and efficacy profiles in Canada (11-13) poses a challenge for clinicians treating  
90 children. An essential medicines list for children in Canada may contribute to  
91 improvements in quality of care while also generating cost savings. (7, 8, 12, 14, 15)



1  
2  
3 92 Our aim was to develop a list of essential medicines for children in Canada based on the  
4  
5 93 WHO model list of essential medicines for children and on the adult essential medicines  
6  
7 94 list we previously created. (3, 16) The provisional child list was created through a peer-  
8  
9 95 reviewed, multi-step process based on current clinical evidence, Canadian clinical  
10  
11 96 practice guidelines and historic prescribing data and is publicly posted at  
12  
13  
14 97 <http://cleanmeds.ca/>.

## 16 98 **METHODS**

### 18 99 **Adaptation of WHO essential medicines list**

20  
21  
22 100 As previously described, (3) we adapted the 2013 WHO Essential Medicines list  
23  
24 101 (16) to create a preliminary essential medicines list for adults in Canada. The purpose of  
25  
26 102 this process was to identify the medicines on the WHO list that are applicable to  
27  
28 103 Canada. Removals from the WHO list were made for 1 of 5 reasons: items were not  
29  
30 104 medications, other medications on the list had better tolerated routes of administration  
31  
32 105 (e.g., oral medication available instead of intravenous), the medications had the same  
33  
34 106 indication as other listed medications, the medications were used for conditions that are  
35  
36 107 uncommon in Canada, or the medications were not medications prescribed by primary  
37  
38 108 care providers. Any disagreements were resolved through discussion and consensus. (3)

39  
40  
41  
42 109 After reviewing the WHO list, we considered adding medications applicable to  
43  
44 110 Canada that were not on the WHO list. We reviewed the following resources to  
45  
46 111 determine if there were medications applicable to Canada that were not on the WHO  
47  
48 112 list: Canadian clinical practice guidelines, systematic reviews, health technology  
49  
50 113 assessment reports and child formularies in other countries. This part of the process  
51  
52 114 generated a draft of the list for wider feedback.

1  
2  
3 115 **Development of the provisional list of essential medicines for children in**  
4 116 **Canada**

5  
6 117 We started with medications that were on both the Canadian adult list (3), and  
7  
8 118 the WHO Model List of Essential Medicines for Children 5<sup>th</sup> edition (9). All medications  
9  
10 119 on our adult essential medicines list that also appeared on the WHO model list for  
11  
12 120 children were added to our draft essential medicines list for children. Medications that  
13  
14 121 were on the WHO model list for children but not on our provisional list were identified  
15  
16 122 for potential inclusion. For each of these medications research team members  
17  
18 123 determined if there was an equivalent medication on the Canadian child list or if the  
19  
20 124 indication for which the medication was prescribed using RxTx (formerly eCPS) or if the  
21  
22 125 medicine was not used in Canada (e.g. treatment for tropical disease). If there was an  
23  
24 126 equivalent, or if the medication was not relevant in the Canadian healthcare context, the  
25  
26 127 medication was not added to our provisional list of essential medicines for children in  
27  
28  
29  
30  
31 128 Canada..

32  
33  
34 129 **Peer review feedback**

35  
36 130 Peer reviewers included pediatricians, primary care physicians, nurse  
37  
38 131 practitioners, pharmacists and consultants or specialists practicing in Canada. The  
39  
40 132 initial child list of essential medicines was made publicly-available via a website  
41  
42 133 ([www.cleanmeds.ca](http://www.cleanmeds.ca)) and feedback on suggested changes to medications on the list was  
43  
44 134 collected through the website. Each proposed change was classified as a replacement, an  
45  
46 135 addition to or removal from the list, and could be justified by at least one of the  
47  
48 136 following: evidence of efficacy, evidence of safety, route of administration and  
49  
50 137 tolerability, dosing schedule, usefulness for other medical conditions, and interactions  
51  
52 138 with other medications. Respondents were allowed to make suggestions for any reason.  
53  
54  
55  
56  
57  
58  
59  
60

1  
2  
3 139 The website has been active since January 2017 and changes can be suggested at any  
4  
5 140 time.

6  
7  
8 141 Peer reviewers were carefully selected based on expertise, publications and academic  
9  
10 142 involvement. We searched Canadian clinical practice guidelines using the repository  
11  
12 143 maintained by the Canadian Medical Association and publications in the *Canadian*  
13  
14 144 *Medical Association Journal, Canadian Family Physician and Paediatrics and Child*  
15  
16 145 *Health* in the last two years for authors of papers in different pediatric therapeutic  
17  
18 146 areas. Thirteen peer reviewers were contacted through mail, fax or email with a  
19  
20 147 description of the project and the website ([www.cleanmeds.ca](http://www.cleanmeds.ca)) where they could submit  
21  
22 148 their proposed list changes. Four peer reviewers suggested changes to the list; the  
23  
24 149 response rate was 31%.

25  
26  
27  
28  
29  
30 150 Based on the suggested additions, subtractions or substitutions to the adapted list  
31  
32 151 made by the peer reviewers, we developed questions focused on efficacy and safety with  
33  
34 152 support from an information scientist and performed a literature search for each  
35  
36 153 question. Five literature searches were performed (one for each suggestion that was  
37  
38 154 made). No searches were run for medicines that remained from the WHO list. Duplicate  
39  
40 155 or similar suggestions were grouped together in one question. Evidence was gathered  
41  
42 156 from systematic reviews, meta-analyses, randomized control trials, the Compendium of  
43  
44 157 Pharmaceuticals and Specialties, clinical practice guidelines and health technology  
45  
46 158 assessment reports. Members of the research team (AB, EO, HW, YR and NP) reviewed  
47  
48 159 the results of the literature searches and compiled the information into an evidence  
49  
50 160 report document. Literature search questions and search strategies were included in the  
51  
52 161 evidence report and are publicly posted online (at [cleanmeds.ca/list/suggest-changes/](http://cleanmeds.ca/list/suggest-changes/)).

1  
2  
3 162 Five clinician-scientists who were all involved in the treatment of children and active  
4  
5 163 researchers were invited to join a panel to discuss the suggestions made by the peer  
6  
7 164 reviewers. They were asked to participate based on their familiarity with clinical issues  
8  
9  
10 165 relevant to the medications on the list, their experience critically appraising clinical  
11  
12 166 evidence (i.e., research training, experience), and a lack of relevant conflicts of interest  
13  
14 167 (including those with pharmaceutical industry). The response rate was 100%; all five  
15  
16  
17 168 clinician-scientists agreed and participated. A meeting was held on 30 March 2017 to  
18  
19 169 discuss changes that were suggested by peer reviewers via the website. Three voting  
20  
21 170 members (clinician-scientists) and NP were present at the meeting. Each participating  
22  
23 171 clinician-scientist was given the evidence report document to review 2 weeks prior to the  
24  
25  
26 172 meeting. Clinician scientists used the information in the documents to form an  
27  
28 173 evidence-based recommendation on addition, removal, or replacement for each  
29  
30 174 suggested medication change. Comments on each suggestion were submitted to the  
31  
32  
33 175 research team by clinician-scientists prior to the meeting. The comments were  
34  
35 176 compiled by research assistants (AB, TL, EO, YR and HW) and presented to all clinician-  
36  
37 177 scientists during the meeting to facilitate discussion among the clinician- scientists.  
38  
39 178 Each voting member discussed their opinion without interruption, followed by open  
40  
41  
42 179 discussion. After each group discussion, the participating clinician-scientists voted by  
43  
44 180 independently recommending whether or not the suggested change should be made  
45  
46 181 based on the evidence gathered and from their own clinical expertise. The meeting  
47  
48 182 employed a modified nominal group technique, involving independent consideration  
49  
50  
51 183 prior to the meeting, group discussion and voting on recommended changes to the  
52  
53 184 adapted list. (3, 17)

1  
2  
3 185 The strength of each recommendation (strong or weak) was determined by the 3  
4  
5 186 participating clinician-scientists. The final recommendations were deemed strong if all  
6  
7 187 clinician-scientists were in agreement for or against the recommendation and at least 2  
8  
9 188 had made strong recommendations. If this criterion was not met, the recommendation  
10  
11 189 was deemed weak in the direction of the majority of clinician-scientist votes. The  
12  
13 190 strength of evidence supporting each recommendation was determined by vote, using  
14  
15 191 the Grading of Recommendations Assessment, Development and Evaluation (GRADE)  
16  
17 192 system. (3, 18) The strength of the recommendation reflects the importance of the  
18  
19 193 decision, while the strength of the evidence reflects how unlikely it is that new evidence  
20  
21 194 would change the recommendation.  
22  
23  
24  
25

### 26 195 **Identification and addition of commonly prescribed medications**

27  
28  
29 196 To identify commonly prescribed medications missing from the list, the Ontario  
30  
31 197 Public Drug Programs prescription data was reviewed. For each medication, if there was  
32  
33 198 an equivalent on the draft child essential medicines list according to the Canadian RxTx,  
34  
35 199 the medication was not selected for further review. Medications were considered  
36  
37 200 equivalent if they treated the same condition and/or were from the same class of  
38  
39 201 medications. The medications that were not already on the provisional essential  
40  
41 202 medicines list for children and for which there were no equivalents were selected for  
42  
43 203 further review. Evidence reports presenting current information about the effectiveness  
44  
45 204 and safety of these medications were created and disseminated to clinician-scientists for  
46  
47 205 review. A clinician-scientist meeting was held on 23 March 2017 where clinician-  
48  
49 206 scientists deliberated and voted for or against addition of each medication to the child  
50  
51 207 essential medicines list. Three voting members (clinician- scientists) and NP were  
52  
53  
54  
55  
56  
57  
58  
59  
60

1  
2  
3 208 present at the meeting. Where there was consensus, the medication was added or not  
4  
5 209 added to the list accordingly and the website was updated. If consensus was not reached,  
6  
7 210 the decision whether to add the medication was deferred until more evidence could be  
8  
9  
10 211 provided.

### 212 **Patient and Community Involvement**

13  
14  
15 213 The process for developing and revising the list was co-developed with a panel of  
16  
17 214 11 community members who were recruited from the area surrounding St Michael's  
18  
19  
20 215 Hospital, Toronto by canvassing, random digit dialing and through existing community  
21  
22 216 groups. The community guidance panel met every one to two months during the  
23  
24 217 development of the list and provided input on issues including the criteria used to select  
25  
26 218 medications, how to maintain the list and the knowledge translation strategy. The  
27  
28 219 community guidance panel members did not suggest particular changes to the  
29  
30 220 medications on the list.

### 31 32 33 34 221 **Ethics approval**

35  
36  
37 222 The study was approved by the Research Ethics Board of St Michael's Hospital, Toronto.

## 38 39 223 **RESULTS**

### 40 41 42 224 **Adaptation of the Essential Medicines List for Adults**

43  
44  
45 225 As previously reported, the provisional Essential Medicines List for Adults  
46  
47 226 contained 134 items. (3) In creation of our provisional list for children, 76 removals  
48  
49 227 from the adult list were made because they were not indicated for use in children in the  
50  
51 228 WHO Model Formulary for Children. This resulted in a provisional child list of 58  
52  
53  
54  
55  
56  
57  
58  
59  
60

1  
2  
3  
4  
5  
6  
7  
8  
9  
10  
11  
12  
13  
14  
15  
16  
17  
18  
19  
20  
21  
22  
23  
24  
25  
26  
27  
28  
29  
30  
31  
32  
33  
34  
35  
36  
37  
38  
39  
40  
41  
42  
43  
44  
45  
46  
47  
48  
49  
50  
51  
52  
53  
54  
55  
56  
57  
58  
59  
60

229 essential medicines. Figure 1 illustrates the development process for the child list of  
230 essential medicines. The list can be found at [cleanmeds.ca](http://cleanmeds.ca).

231

Confidential

232 **Figure 1.** Flow diagram summarizing the development of the provisional essential  
 233 medicines list for children in Canada

234  
 235 **Development of the Provisional Essential Medicines List for Children in Canada**

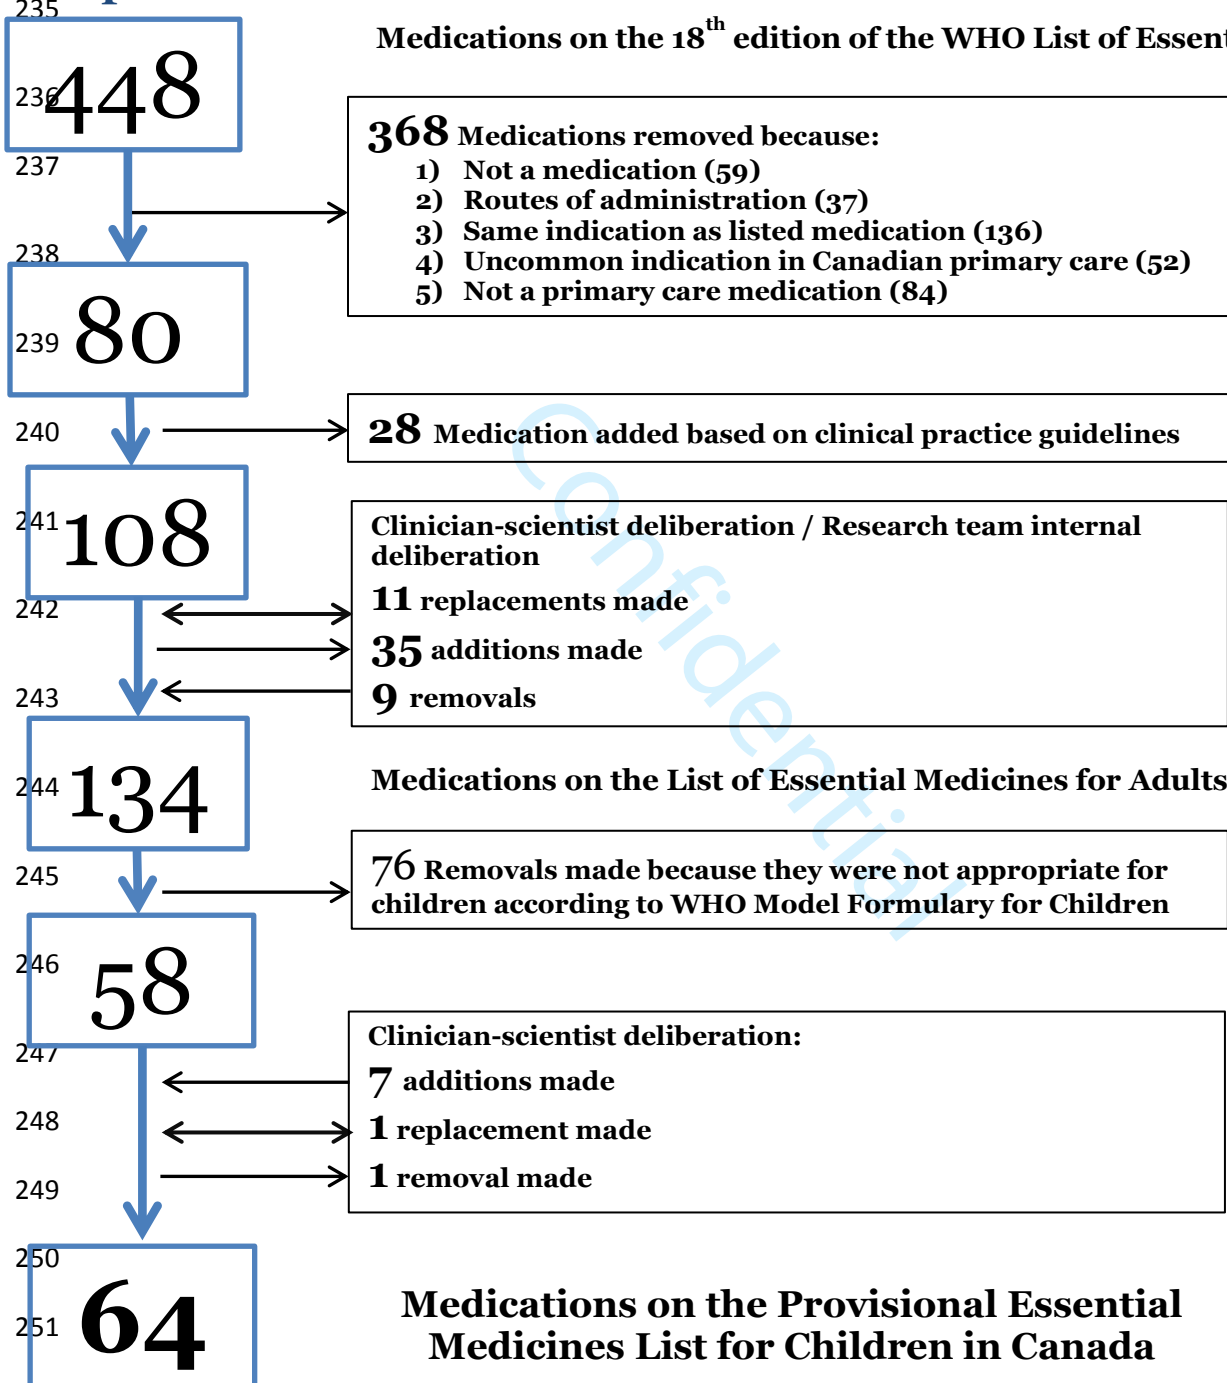

253

254



### 255 **Clinician-scientist review**

256 Evidence reports for the potential additions to the list based on Ontario Public  
257 Drug Program prescribing data were presented to clinician-scientists for review and a  
258 clinician-scientist meeting was held where deliberation took place. As a result of this  
259 process, 7 medications were added to the essential medicines list for children in Canada.

### 260 **Peer-review suggestions**

261 Suggestions to add, remove, or substitute medications on the list were made by  
262 peer-reviewers. An evidence report for each suggestion was created based on up-to-date  
263 scientific evidence and provided to clinician-scientists for further review. Deliberations  
264 that took place at clinician-scientist meetings lead to one medication removal and one  
265 medication replacement for a total of 64 medications on the initial list for children.

### 266 **INTERPRETATION**

267 We adapted the Essential Medicines List for Adults development scheme, using a  
268 4-step process involving a small group of Canadian clinicians and clinician-scientists.  
269 The provisional child essential medicines list for Canada contains 64 medications. This  
270 is a work-in-progress, and the list will likely be revised and grow as further input is  
271 gathered. The current short list may allow clinicians to learn more about fewer drugs  
272 and could improve appropriateness of clinician prescribing. (3, 19)

273 Child essential medicine lists differ from country to country in the way they are  
274 developed and presented; some countries include details of the list development process  
275 and guidelines for preparation, prescribing, and how to use the document. Some lists  
276 are standalone documents specific to children while others are a pediatric section within  
277 a larger list or formulary. The number of medications included in child essential

1  
2  
3 278 medicine lists or formularies ranges from 4 (Egypt) to over 1000 (United Kingdom).  
4  
5 279 (20-21) List information by country is presented in Table 1.  
6  
7

8 280 Details on the development process for pediatric lists and formularies are not  
9  
10 281 readily available for all countries; however, some countries make this information  
11  
12 282 publicly available. The British National Formulary for Children and the  
13  
14 283 Kinderformularium (The Dutch Paediatric Formulary) present information on the  
15  
16 284 development of their child formularies including the contributing bodies, the sources of  
17  
18 285 information and how the information has been validated. (21-22) While these are not  
19  
20 286 essential medicines lists, their purpose is similar to that of our child essential medicines  
21  
22 287 list- to aid decisions on prescribing, dispensing and administration of medicines. (21-  
23  
24 288 22) The process for developing the British National Formulary for Children and the  
25  
26 289 Dutch Paediatric Formulary is aligned with the process for developing our child  
27  
28 290 essential medicines list: collaboration; consulting expert clinical advisors, literature,  
29  
30 291 systematic reviews, consensus guidelines, reference sources, comments from readers;  
31  
32 292 and continuous revision are important components. The British National Formulary for  
33  
34 293 Children also includes information on how to use the formulary, selecting suitable  
35  
36 294 preparations, dose selection, writing prescriptions, and so on. (21) Likewise, South  
37  
38 295 Africa includes these details around the development process for their Standard  
39  
40 296 Treatment Guidelines and Essential Medicines List for hospital level paediatrics as does  
41  
42 297 India for their Essential Medicines List for Children. (24-25) The processes and  
43  
44 298 methods used in other jurisdictions will continue to be consulted while further  
45  
46 299 developing and maintaining the provisional essential medicines list for children in  
47  
48  
49  
50  
51  
52  
53  
54 300 Canada.  
55  
56  
57  
58  
59  
60

1  
2  
3 301 The provisional list of essential medicines for children we have created lists  
4  
5 302 medications in alphabetical order or therapeutic area and includes contraindications,  
6  
7 303 drug interactions or cautions, adverse effects, dosing information, monitoring, and the  
8  
9 304 source of the suggestion. Further details and the presentation of our child list are to be  
10  
11 305 decided through additional input and collaboration.  
12  
13  
14

15 306 **Table 1.** Child essential medicines lists and child formularies in several countries  
16

|                                          | <b>Essential Medicines List or formulary</b> | <b># of medicines</b> | <b>Development process described</b> |
|------------------------------------------|----------------------------------------------|-----------------------|--------------------------------------|
| <b>Canada</b>                            | Essential Medicines List                     | 64                    | No                                   |
| <b>Democratic Republic of Congo (26)</b> | Essential Medicines List                     | 48                    | No                                   |
| <b>Egypt (20)</b>                        | Formulary                                    | 4                     | No                                   |
| <b>India (25)</b>                        | Essential Medicines List                     | 134                   | Yes                                  |
| <b>Kiribati (27)</b>                     | Formulary                                    | 21                    | No                                   |
| <b>Netherlands (28)</b>                  | Formulary                                    | 726                   | Yes                                  |
| <b>New Zealand (29)</b>                  | Formulary                                    | Not available         | Not available                        |
| <b>South Africa (24)</b>                 | Essential Medicines List                     | 249                   | Yes                                  |
| <b>Togo (30)</b>                         | Essential Medicines List                     | 219                   | No                                   |
| <b>United Kingdom (21)</b>               | Formulary                                    | over 1000             | Yes                                  |

17  
18  
19  
20  
21  
22  
23  
24  
25  
26  
27  
28  
29  
30  
31  
32  
33  
34  
35  
36  
37  
38  
39  
40  
41  
42  
43  
44 307

### 45 308 **Limitations**

46  
47  
48  
49 309 The process was dependent on evidence for the individual medicines and high  
50  
51 310 quality evidence in children was often lacking. It is unclear if it would be better to  
52  
53  
54 311 consider lower quality studies. More quality evidence would facilitate the child essential  
55  
56  
57  
58  
59  
60

1  
2  
3 312 medicines list development. In many cases, there is not a clear basis for prescribing  
4  
5 313 advice in children.  
6  
7

8 314 The list was peer reviewed by a small number of individuals. Other medications,  
9  
10 315 including those usually prescribed by sub-specialists (e.g. seizure disorder medications),  
11  
12 316 may have been suggested if there were more peer reviewers. The small number of  
13  
14 317 clinician-scientists making the final decisions meant that the final composition of the  
15  
16 318 list could have been dependent on the judgments of just a few individuals.  
17  
18  
19

20 319 Using commonly prescribed medications as one of the starting points for list  
21  
22 320 development could reinforce inappropriate prescribing practices, however, evidence  
23  
24 321 reports regarding the safety and efficacy for each medication were created and  
25  
26 322 disseminated to clinician-scientists prior to final recommendations on whether to add  
27  
28 323 these medications.  
29  
30  
31

32 324 We did not consider local availability of medications in creating the provisional  
33  
34 325 essential medicines list for children in Canada; the current availability of medicines as  
35  
36 326 products that can be ordered through Canadian pharmacy wholesalers was not within  
37  
38 327 the scope of this research.  
39  
40  
41

## 42 328 **CONCLUSION**

43

44 329 We have developed a provisional short list of essential medications for children  
45  
46 330 that can be refined in the future based on wider input. The list should be continuously  
47  
48 331 revised based on new evidence. Future work should determine the applicability of the  
49  
50 332 list across Canada, the impact of list adoption on actual prescribing, and the effects of  
51  
52 333 list-driven prescribing on patients.  
53  
54  
55  
56  
57  
58  
59  
60

1  
2  
3 334 **REFERENCES**  
4

- 5 335 1. WHO. Essential medicines selection - National Medicines List/Formulary/Standard  
6 336 Treatment Guidelines; 2014. Available from:  
7 337 [http://www.who.int/selection\\_medicines/country\\_lists/en/](http://www.who.int/selection_medicines/country_lists/en/)  
8  
9 338 2. WHO. The selection of essential drugs: report of the WHO Expert Committee;  
10 339 1977;(615):1-36.  
11  
12 340 3. Taglione MS, Ahmad H, Slater M, Aliarzadeh B, Glazier RH, Laupacis A, Persaud N.  
13 341 Development of a preliminary essential medicines list for Canada. CMAJ open. 2017  
14 342 Jan;5(1):E137.  
15  
16 343 4. Yakabowich MR, Keeley G, Montgomery PR. Impact of a formulary on personal care  
17 344 homes in Manitoba. CMAJ: Canadian Medical Association Journal. 1994 May  
18 345 15;150(10):1601.  
19  
20 346 5. Feely J, Chan R, Cocoman L, Mulpeter K, O'Connor P. Hospital formularies: need for  
21 347 continuous intervention. BMJ. 1990 Jan 6;300(6716):28-30.  
22  
23 348 6. King MA, Roberts MS. The influence of the Pharmaceutical Benefits Scheme (PBS) on  
24 349 inappropriate prescribing in Australian nursing homes. Pharmacy world & science.  
25 350 2007 Feb 1;29(1):39-42.  
26  
27 351 7. Eom G, Grootendorst P, Duffin J. The case for an essential medicines list for Canada.  
28 352 Canadian Medical Association Journal. 2016 Jun 13;cmaj-160134.  
29  
30 353 8. Sketris IS, Lummis H, Langille E. Optimal prescribing and medication use in Canada:  
31 354 challenges and opportunities. In: Canada HCo, editor.: Citeseer; 2007.  
32  
33 355 9. WHO. Model list of essential medicines for children. 5<sup>th</sup> list; 2015. Available from:  
34 356 <http://www.who.int/medicines/publications/essentialmedicines/en/index.html>  
35 357  
36 358 10. World Health Organization. World Health Assembly: Resolution WHA60.20 better  
37 359 medicines for children; 2007. Available from:  
38 360 <http://www.who.int/entity/childmedicines/publications/WHA6020.pdf>  
39 361  
40 362 11. Ontario Public Drug Programs - Formulary - Drugs Funded by Ontario Drug Benefit  
41 363 (ODB) Program; 2014 [cited 2017 June]. Available from:  
42 364 [http://www.health.gov.on.ca/en/pro/programs/drugs/odbf\\_mn.aspx](http://www.health.gov.on.ca/en/pro/programs/drugs/odbf_mn.aspx)  
43  
44 365 12. Alberta Health - Alberta Drug Benefit List (ABDL); 2015 [cited 2017 June]. Available  
45 366 from: <http://www.health.alberta.ca/services/drug-benefit-list.html>  
46  
47 367 13. Prescription drug insurance - Prescription drugs covered - Prescription drugs  
48 368 covered by the Public Prescription Drug Insurance Plan; 2015 [cited 2017 June].  
49 369 Available from: [http://www.ramq.gouv.qc.ca/en/citizens/prescription-drug-](http://www.ramq.gouv.qc.ca/en/citizens/prescription-drug-insurance/pages/prescription-drugs-covered.aspx)  
50 370 [insurance/pages/prescription-drugs-covered.aspx](http://www.ramq.gouv.qc.ca/en/citizens/prescription-drug-insurance/pages/prescription-drugs-covered.aspx)  
51  
52 371 14. Quittner AL, Modi AC, Lemanek KL, Ievers-Landis CE, Rapoff MA. Evidence-based  
53 372 assessment of adherence to medical treatments in pediatric psychology. Journal of  
54 373 pediatric psychology. 2008 Oct 1;33(9):916-36.  
55  
56  
57  
58  
59  
60

- 1  
2  
3 374 15. Council of Canadian Academics. Improving medicines for children in Canada. The  
4 375 expert panel on therapeutic products for infants, children, and youth; 2014. Available  
5 376 from:  
6 377 [http://www.scienceadvice.ca/uploads/eng/assessments%20and%20publications%20and%20news%20releases/therapeutics/therapeutics\\_fullreporten.pdf](http://www.scienceadvice.ca/uploads/eng/assessments%20and%20publications%20and%20news%20releases/therapeutics/therapeutics_fullreporten.pdf)  
7 378  
8  
9 379 16. WHO. Model List of Essential Medicines; 2013. Available from:  
10 380 [http://www.who.int/medicines/publications/essentialmedicines/18th\\_EML\\_Final\\_web\\_8Jul13.pdf](http://www.who.int/medicines/publications/essentialmedicines/18th_EML_Final_web_8Jul13.pdf)  
11 381  
12 382 17. Nair R, Aggarwal R, Khanna D. Methods of formal consensus in  
13 383 classification/diagnostic criteria and guideline development. *Seminars in arthritis and*  
14 384 *rheumatism*. 2011;41(2):95-105.  
15 385 18. Guyatt GH, Oxman AD, Vist GE, Kunz R, Falck-Ytter Y, Alonso-Coello P, et al.  
16 386 GRADE: an emerging consensus on rating quality of evidence and strength of  
17 387 recommendations. *BMJ (Clinical research ed.)*. 2008 Apr 26.  
18 388 19. Avery AJ, Walker B, Heron T, Teasdale SJ. Do prescribing formularies help GPs  
19 389 prescribe from a narrower range of drugs? A controlled trial of the introduction of  
20 390 prescribing formularies for NSAIDs. *British Journal of General Practice*.  
21 391 1997;47(425):810-4.  
22 392 20. Ministry of Health and Population Central Administration of Pharmaceutical  
23 393 Affairs. Egyptian national formulary; 2007. Available from:  
24 394 <http://apps.who.int/medicinedocs/documents/s17411e/s17411e.pdf>  
25 395  
26 396 21. Paediatric Formulary Committee. *British National Formulary for Children (2015)*.  
27 397 London: BMJ Group. 2015.  
28 398 22. van der Zanden TM, de Wildt SN, Liem Y, Offringa M, de Hoog M. Developing a  
29 399 paediatric drug formulary for the Netherlands. *Archives of disease in childhood*. 2016  
30 400 Oct 31:archdischild-2016.  
31 401 23. Kelly LE, Ito S, Woods D, Nunn AJ, Taketomo C, de Hoog M, Offringa M. A  
32 402 Comprehensive List of Items to be Included on a Pediatric Drug Monograph. *The*  
33 403 *Journal of Pediatric Pharmacology and Therapeutics*. 2017 Jan;22(1):48-59.  
34 404  
35 405 24. The National Department of Health. Standard treatment guidelines and essential  
36 406 medicines list for South Africa. 2013 edition; 2013. Available from:  
37 407 <http://www.kznhealth.gov.za/pharmacy/PaedsSTG2013LR.pdf>  
38 408  
39 409 25. Indian Academy of Pediatrics. List of essential medicines for children of India. First  
40 410 list-2011. Available from:  
41 411 <http://apps.who.int/medicinedocs/documents/s19040en/s19040en.pdf>  
42 412  
43 411 26. Ministere de la Sante des Affaires Sociales et de la Famille. Republique du Congo  
44 412 strategies plaintes -traitements enfants; 2006. Available from

- 1  
2  
3 413 [http://www.who.int/selection\\_medicines/country\\_lists/Congo\\_STGChildren\\_2006.pdf?ua=1](http://www.who.int/selection_medicines/country_lists/Congo_STGChildren_2006.pdf?ua=1)  
4 414  
5  
6  
7 415 27. Kiribati Ministry of Health. Obstetrics, gynaecology, paediatrics and dental drug  
8 416 guidelines December 2007. Available from:  
9 417 [http://www.who.int/selection\\_medicines/country\\_lists/kir\\_book4.pdf?ua=1](http://www.who.int/selection_medicines/country_lists/kir_book4.pdf?ua=1)  
10 418  
11 419 28. Foundation Dutch Knowledge Centre for Pharmacotherapy in children (NKFK).  
12 420 Kinderformularium. Available from: <https://www.kinderformularium.nl>  
13  
14 421 29. New Zealand Formulary for Children (NZFC). NZFC;2013. Available from:  
15 422 [www.nzfchildren.org.nz](http://www.nzfchildren.org.nz)  
16  
17  
18 423 30. Defence for Children International. Liste nationale des medicament essentiels sous  
19 424 dci pour les enfants (<14 ans); 2012. Available from:  
20 425 [http://www.who.int/selection\\_medicines/country\\_lists/Togo\\_LNME\\_Enfant\\_2012.pdf?ua=1](http://www.who.int/selection_medicines/country_lists/Togo_LNME_Enfant_2012.pdf?ua=1)  
21 426  
22  
23  
24  
25  
26  
27  
28  
29  
30  
31  
32  
33  
34  
35  
36  
37  
38  
39  
40  
41  
42  
43  
44  
45  
46  
47  
48  
49  
50  
51  
52  
53  
54  
55  
56  
57  
58  
59  
60
